# Supplementary material for: ﻿Designation of the neotype of Triatomadimidiata (Latreille, 1811) (Hemiptera, Reduviidae, Triatominae), with full integrated redescription including mitogenome and nuclear ITS-2 sequences
Source: Zookeys. 2021 Dec 8;1076:9–24. doi: 10.3897/zookeys.1076.72835 (PMC8674215; doi:10.3897/zookeys.1076.72835)
Supplement: Supplementary material 1 — Specimens metadata [file zookeys-1076-009-s001.xlsx]

## Sheet: Sheet2
Barcode Number	Sex	Stage	Locality	Date collected	Collector
USNMENT01239305	Male	Adult	Belize:Toledo :8 Km NW Punta Gorda (Borland's Cave)	1981-06-29	W. E. Steiner
USNMENT01241973	Male	Adult	Belize:Toledo :8 Km NW Punta Gorda (Borland's Cave)	1981-06-29	W. E. Steiner
USNMENT01241971	Male	Adult	Belize:Toledo :8 Km NW Punta Gorda (Borland's Cave)	1981-06-29	W. E. Steiner
USNMENT01241972	Male	Adult	Belize:Toledo :8 Km NW Punta Gorda (Borland's Cave)	1981-06-29	W. E. Steiner
USNMENT01241965	Female	Adult	Belize:Toledo :8 Km NW Punta Gorda (Borland's Cave)	1981-06-29	W. E. Steiner
USNMENT01222356	Male	Adult	Peru	1996	J. Maldonado
USNMENT01222354	Male	Adult	Peru	1996	J. Maldonado
USNMENT01222355	Female	Adult	Peru	1996	J. Maldonado
USNMENT01222351	Female	Adult	Peru	1996	J. Maldonado
USNMENT01222353	Male	Adult	Peru	1996	J. Maldonado
USNMENT01241936	Male	Adult	Belize:Toledo :8 Km NW Punta Gorda (Borland's Cave)
USNMENT01239306	Male	Adult	:Cordoba:
USNMENT01239310	Male	Adult		1937-05-07	Chorrero R.P
USNMENT01239324	Male	Adult	Panama:Canal Zone:		Dr. Gregoire; Mrs. Gregoire;
USNMENT01239325	Male	Adult	Panama:Canal Zone:		Dr. Gregoire; Mrs. Gregoire;
USNMENT01239326	Male	Adult	Panama:Canal Zone:		Dr. Gregoire; Mrs. Gregoire;
USNMENT01239327	Female	Adult	Panama:Canal Zone:	2-7 July 1973
USNMENT01239328	Male	Adult	Panama:Canal Zone:		Dr. Gregoire; Mrs. Gregoire;
USNMENT01239329	Female	Adult	Panama:Canal Zone:	17-21 II 1963	Blake; Cochrane;
USNMENT01239332	Male	Adult	Panama:Canal Zone:	17-21 II 1963	Blake; Cochrane;
USNMENT01239333	Male	Adult	Panama:Canal Zone:		Dr. Gregoire; Mrs. Gregoire;
USNMENT01239334	Male	Adult	Panama	11-17 Dec 1964	K. W. Cooper
USNMENT01239335	Male	Adult	Panama	11-17 Dec 1964	K. W. Cooper
USNMENT01239336	Male	Adult	Panama	11-17 Dec 1964	K. W. Cooper
USNMENT01239337	Female	Adult	:Ish. of Tehuantepec:	1969-05-01	F. Simichrast
USNMENT01239338	Male	Adult	Mexico:San Andres:
USNMENT01239339	Male	Adult	Mexico:San Andres:
USNMENT01241945	Male	Adult	Mexico	20 VIII 1967	Gary F. Hevel
USNMENT01239340	Female	Adult	Mexico:Yucatan:	1975-06-23	A. Grubbs
USNMENT01239341	Male	Adult	Mexico:San Luis Potosi:	V-20-1952	M. Cazier; W. Gertsh; R. Schrammel
USNMENT01239342	Male	Adult	Mexico:San Andres:
USNMENT01241953	Female	Adult	Mexico:S.L.P:Hwy. Km 642.6	1952	A. Loeblick
USNMENT01239343	Female	Adult
USNMENT01239344	Female	Adult	Maxico
USNMENT01239313	Male	Adult	Costa Rica		V. Patten
USNMENT01239345	Male	Adult	Costa Rica:San Jose:	1928	MVAlero
USNMENT01239346	Male	Adult	British Hon:San Antonio:	1931-06-01	J. J. White
USNMENT01239348	Male	Adult	Belize:Cayo Dist.:Riverside N Mopan	11-IV-07	P. Picon
USNMENT01239349	Male	Adult	Costa Rica:Guanacaste:Maritza, Rio Tempisquito	17-18.vi.1988	C.M Flint; O.S. Flint; Holzenthal
USNMENT01239347	Female	Adult	El Salvador:San Salvador:	1958-06-07	OLCartwright
USNMENT01239350	Female	Adult	El Salvador:La Ceiba:	January 9 - 1925	KASalman
USNMENT01241948	Female	Adult	El Salvador:L. Ilopango:	4-5 Jul 1966	Flint; Ortiz;
USNMENT01241968	Male	Adult	Colombia	IX-14-42
USNMENT01239353	Female	Adult	Central America
USNMENT01239354	Female	Adult	Ecuador	1942	F. Campos
USNMENT01239352	Female	Adult	Ecuador	1942	F. Campos
USNMENT01241967	Female	Adult	Colombia
USNMENT01239356	Female	Adult	Ecuador	1942	F. Campos
USNMENT01239351	Female	Adult	Ecuador:Guayaquil:	57	R. L. Castillo
USNMENT01239361	Male	Adult	Belize:Cayo Dist.:3Km SW		Paul. J. Spangler; Robin A. Falcoute;
USNMENT01241946	Female	Adult	Mexico:Yucatan:	VII-29-30-1964	Paul. J. Spangler
USNMENT01241952	Male	Adult	Mexico:Chiapas:		L. Hotzen
USNMENT01239362	Male	Adult	:N. Yucatan:		Gaumer
USNMENT01239363	Male	Adult	Mexico:Chiapas:Boca Lacantun	24-V-84	Ernesto Barrera
USNMENT01241957	Female	Adult	Ecuador:Guayaquil:	51	RL Castillo
USNMENT01241947	Female	Adult	El Salvador		Alfredo Martinez Cuestas
USNMENT01241955	Female	Adult	El Salvador		Alfredo Martinez Cuestas
USNMENT01239364	Female	Adult	:San Salvador:		Dr. S. Calderon
USNMENT01241964	Female	Adult	EL Salvador:San Salvador:	VII-1935	Carlos Leiva
USNMENT01241960	Male	Adult	Colombia:Don Amo:	2019-07-19
USNMENT01239365	Male	Adult	Nicaragua:Managua:	Aug 8/10
USNMENT01239366	Female	Adult	Nicaragua:Managua:		KD Hummel
USNMENT01239367	Male	Adult	Nicaragua	IX-18-42
USNMENT01239368	Female	Adult	Nicaragua
USNMENT01239369	Male	Adult	Nicaragua
USNMENT01239359	Female	Adult	Nicaragua:Managua:		Artemis Rene
USNMENT01239356	Female	Adult	Nicaragua:S Antonio:	May, 1899
USNMENT01239355	Male	Adult	Nicaragua
USNMENT01239357	Male	Adult	Costa Rica
USNMENT01241962	Male	Adult	Costa Rica:Guanacaste:Maritza, Rio Tempisquito	17-18.vi.1988	C.M Flint; O.S. Flint; Holzenthal
USNMENT01239371	Male	Adult	Panama:Barro Colorado IS. :	10-20-IV-65	SS Duckworth; WD Duckworth;
USNMENT01239370	Male	Adult	Panama:Barro Colorado IS. :	10-20-IV-65	SS Duckworth; WD Duckworth;
USNMENT01239373	Female	Adult	El Salvador		Alfredo Martinez Cuestas
USNMENT01239374	Male	Adult	Panama:Barro Colorado IS. :	10-20-IV-65	SS Duckworth; WD Duckworth;
USNMENT01239372	Male	Adult	Panama:Barro Colorado IS. :	10-20-IV-65	SS Duckworth; WD Duckworth;
USNMENT01239375	Female	Adult	Panama:Barro Colorado IS. :	10-20-IV-65	SS Duckworth; WD Duckworth;
USNMENT01239383	Male	Adult	Guatemala	Feb. 62
USNMENT01239384	Female	Adult	Guatemala
USNMENT01239382	Female	Adult	Guatemala:Santa Lucia:	Feb. 1906	EB. Williamsom; Conorhinus dimidiatus Latr. 1811 (Neiva);
USNMENT01239380	Male	Adult
USNMENT01239381	Female	Adult
USNMENT01239377	Male	Adult
USNMENT01239376	Male	Adult
USNMENT01239390	Female	Adult	Honduras
USNMENT01239391	Female	Adult	Honduras
USNMENT01239392	Female	Adult	Honduras
USNMENT01239393	Male	Adult	Honduras
USNMENT01239394	Female	Adult	Honduras
USNMENT01241974	Male	Adult	Belize:Toledo dist:*Km NW Punta Gorda (Borland's Cave)	1981-06-29	W. W. Steiner
USNMENT01241966	Female	Adult	Costa Rica:San Ramon:3 Rios	1972-08-10	R. Zeledon
USNMENT01241969	Female	Adult	ColombiaDon Amo	1956	C. J. Drake
USNMENT01241963	Male	Adult	Costa Rica:San Jose:	1968-01-11	J. Ulatem
USNMENT01241961	Female	Adult	Costa Rica:Turrialba:	1-6.III.65	SS Duckworth; WD Duckworth;
USNMENT01241949	Male	Adult	MexicoCiudad de Valle	26 IV 1979	L. Black
USNMENT01241954	Male	Adult	MexicoMesa de San Diego, PUE. Est. Bombco I	10-V-53
USNMENT01239408	Female	Adult	Nicaragua
USNMENT01239387	Female	Adult	Matagalpa, Parque dario	1985-07-09	M. C. Kroudie
USNMENT01239417	Male	Adult	Nicaragua
USNMENT01239406	Male	Adult	Nicaragua:San Antonio:	May 1899
USNMENT01222350	Female	Adult	Peru
USNMENT01239396	Female	Adult
USNMENT01239397	Female	Adult
USNMENT01239398	Male	Adult
USNMENT01239399	Female	Adult
USNMENT01239404	Female	Adult
USNMENT01239409	Female			13/04/85	Yanira Orellana
AMNH_IZC 00319726	Male	Adult	MEXICO: Yucatan: none or unknown: Merida 20 58 0 N, 89 37 0 W; 36 ft	1963-08-14	Scullen,Bollinger
AMNH_IZC 00319727	Male	Adult	MEXICO: Yucatan: none or unknown: Merida 20 58 0 N, 89 37 0 W; 36 ft	1963-08-14	Scullen,Bollinger
AMNH_IZC 00319728	Male	Adult	MEXICO: Yucatan: none or unknown: Merida 0 N, 0 E		Scullen,Bollinger
AMNH_IZC 00319730	Male	Adult	MEXICO: Yucatan: none or unknown: Merida 0 N, 0 E	1963-08-13	Scullen,Bollinger
AMNH_IZC 00319731	Female	Adult	MEXICO: Yucatan: none or unknown: Merida 0 N, 0 E	1963-08-13	Scullen,Bollinger
AMNH_IZC 00319732	Female	Adult	MEXICO: Yucatan: none or unknown: Merida 0 N, 0 E	1963-08-13	Scullen,Bollinger
AMNH_IZC 00319733	Female	Adult	MEXICO: Yucatan: none or unknown: Merida 0 N, 0 E	1963-08-13	Scullen,Bollinger
AMNH_IZC 00319734	Male	Adult	MEXICO: Yucatan: none or unknown: Chuminopolis 20 52 1 N, 89 52 1 W	1952-08-06	J. Pallister,D. Pallister
AMNH_IZC 00319735	Male	Adult	MEXICO: Yucatan: none or unknown: Chuminopolis 20 52 1 N, 89 52 1 W	1952-08-06	J. Pallister,D. Pallister
AMNH_IZC 00319736	Female	Adult	MEXICO: Yucatan: none or unknown: Chuminopolis 20 52 1 N, 89 52 1 W	1952-08-06	J. Pallister,D. Pallister
AMNH_IZC 00319737	Female	Adult	MEXICO: Yucatan: none or unknown: Chuminopolis 20 52 1 N, 89 52 1 W	1952-08-06	J. Pallister,D. Pallister
AMNH_IZC 00319738	Female	Adult	MEXICO: Yucatan: none or unknown: Chuminopolis 20 52 1 N, 89 52 1 W	1952-08-06	J. Pallister,D. Pallister
AMNH_IZC 00319739	Female	Adult	MEXICO: Yucatan: none or unknown: Chuminopolis 20 52 1 N, 89 52 1 W	1952-08-06	J. Pallister,D. Pallister
AMNH_IZC 00319740	Female	Adult	MEXICO: Yucatan: none or unknown: Chuminopolis 20 52 1 N, 89 52 1 W	1952-08-06	J. Pallister,D. Pallister
AMNH_IZC 00319741	Female	Adult	MEXICO: Yucatan: none or unknown: Chuminopolis 20 52 1 N, 89 52 1 W	1952-08-06	J. Pallister,D. Pallister
AMNH_IZC 00319742	Male	Adult	MEXICO: Yucatan: none or unknown: Chuminopolis 20 52 1 N, 89 52 1 W	1952-08-04	J. Pallister,D. Pallister
AMNH_IZC 00319743	Female	Adult	MEXICO: Yucatan: none or unknown: Chuminopolis 20 52 1 N, 89 52 1 W	1952-08-04	J. Pallister,D. Pallister
AMNH_IZC 00319744	Male	Adult	MEXICO: Yucatan: none or unknown: Chuminopolis 20 52 1 N, 89 52 1 W	1952-08-08	J. Pallister,D. Pallister
AMNH_IZC 00319745	Female	Adult	MEXICO: Yucatan: none or unknown: Chuminopolis 20 52 1 N, 89 52 1 W	1952-07-07	J. Pallister,D. Pallister
AMNH_IZC 00319746	Male	Adult	MEXICO: Yucatan: none or unknown: Chuminopolis 20 52 1 N, 89 52 1 W	1952-09-08	J. Pallister,D. Pallister
AMNH_IZC 00319747	Female	Adult	MEXICO: Yucatan: none or unknown: Chuminopolis 20 52 1 N, 89 52 1 W	1952-09-17	J. Pallister,D. Pallister
AMNH_IZC 00319748	Female	Adult	MEXICO: Yucatan: none or unknown: Chuminopolis 20 52 1 N, 89 52 1 W	1952-09-18	J. Pallister,D. Pallister
AMNH_IZC 00319749	Male	Adult	MEXICO: Yucatan: none or unknown: Chuminopolis 20 52 1 N, 89 52 1 W	1964-08-06	John C. Pallister,D. Pallister
AMNH_IZC 00319750	Male	Adult	MEXICO: Yucatan: none or unknown: Chuminopolis 20 52 1 N, 89 52 1 W	1964-08-08	John C. Pallister,D. Pallister
AMNH_IZC 00319751	Female	Adult	MEXICO: Yucatan: none or unknown: Chuminopolis 20 52 1 N, 89 52 1 W	1964-07-20	John C. Pallister,D. Pallister
AMNH_IZC 00319752	Female	Adult	MEXICO: Yucatan: none or unknown: Chuminopolis 20 52 1 N, 89 52 1 W	1964-08-31	John C. Pallister,D. Pallister
AMNH_IZC 00319753	Male	Adult	MEXICO: Yucatan: none or unknown: Colonia Yucatan 21 15 N, 87 38 W; 32 ft	1952-08-14	J. Pallister,D. Pallister
AMNH_IZC 00319754	Male	Adult	MEXICO: Yucatan: none or unknown: Chichen Itza 20 40 0.0 N, 88 34 0.0 W	1952-09-12	J. Pallister,D. Pallister
AMNH_IZC 00319755	Female	Adult	MEXICO: Yucatan: none or unknown: Chichen Itza 20 40 0.0 N, 88 34 0.0 W	1952-07-12	J. Pallister,D. Pallister
AMNH_IZC 00319756	Female	Adult	MEXICO: Yucatan: none or unknown: Cordeleria Mayapan 20 28 1 N, 89 12 50 W; 76 ft	1952-08-09	J. Pallister,D. Pallister
AMNH_IZC 00319757	Female	Adult	MEXICO: Yucatan: none or unknown: Cordeleria Mayapan 20 28 1 N, 89 12 50 W; 76 ft	1952-08-09	J. Pallister,D. Pallister
AMNH_IZC 00319758	Male	Adult	MEXICO: Yucatan: none or unknown: Chichen Itza 20 40 0.0 N, 88 34 0.0 W	2021-06-29	Unknown
AMNH_IZC 00319759	Male	Adult	MEXICO: Yucatan: none or unknown: Chichen Itza 20 40 0.0 N, 88 34 0.0 W	2021-06-29	Unknown
AMNH_IZC 00319760	Male	Adult	MEXICO: Yucatan: none or unknown: Chichen Itza 20 40 0.0 N, 88 34 0.0 W		Ricketson
AMNH_IZC 00319761	Male	Adult	MEXICO: Yucatan: none or unknown: Chichen Itza 20 40 0.0 N, 88 34 0.0 W		Ricketson
AMNH_IZC 00319762	Female	Adult	MEXICO: Yucatan: none or unknown: Temax 21 9 N, 88 56 0 W		Gaumer
AMNH_IZC 00319763	Female	Adult	MEXICO: Yucatan: none or unknown: Temax 21 9 N, 88 56 0 W		Gaumer
AMNH_IZC 00319764	Male	Adult	MEXICO: Yucatan: none or unknown: Itzimna 20 59 36.0 N, 89 37 W; 47 ft	1964-09-04	John C. Pallister,D. Pallister
AMNH_IZC 00319765	Male	Adult	MEXICO: Yucatan: none or unknown: Merida 20 58 0 N, 89 37 0 W; 36 ft	25 Jul 1962 / 22 Jul 1965	H. E. Evans
AMNH_IZC 00319766	Male	Adult	MEXICO: Quintana Roo: none or unknown: Xcan Nuevo 20 41 7.7 N, 87 22 47.1 W	07 Jun 1959 / 06 Jun 1959	P. Vaurie,C. Vaurie
AMNH_IZC 00319767	Male	Adult	MEXICO: Quintana Roo: none or unknown: Xcan Nuevo 20 41 7.7 N, 87 22 47.1 W	07 Jun 1959 / 06 Jun 1959	P. Vaurie,C. Vaurie
AMNH_IZC 00319768	Male	Adult	MEXICO: none or unknown: none or unknown: Mexico 0 N, 0 E		Mazzotti
AMNH_IZC 00319769	Female	Adult	MEXICO: Ciudad de Mexico: Instituto de Enfermedades Tropicales		Luis Vargas
AMNH_IZC 00319770	Female	Adult	MEXICO: Oaxaca: none or unknown: Oaxaca 17 2 0.0 N, 96 44 0.0 W		Unknown
AMNH_IZC 00319771	Male	Adult	MEXICO: Chiapas: none or unknown: 31 mi SE of Comitan	1965-06-18	Burke,Meyer,Schaffner
AMNH_IZC 00319772	Male	Adult	MEXICO: San Luis Potosi: Tamazunchale: Tamazunchale 21 16 0.0 N, 98 47 0.0 W	1952-05-20	M. Cazier,W. Gertsch,R. Schrammel
AMNH_IZC 00319773	Male	Adult	MEXICO: Jalisco: none or unknown: Jocotepec 20 18 N, 103 26 0.0 W	1967-03-13	E. E. Bruhn
AMNH_IZC 00319780	Female	Adult	HONDURAS: Francisco Morazan: None: Tegucigalpa 14 6 N, 87 13 0 W; 3218 ft	2017-09-01	F. J. Dyer
AMNH_IZC 00319782	Male	Adult	NICARAGUA: none or unknown: Nicaragua		O. Sacken
AMNH_IZC 00319783	Female	Adult	NICARAGUA: none or unknown: Nicaragua		Unknown
AMNH_IZC 00319784	Female	Adult	NICARAGUA: none or unknown: Ocotal	May	W. B. Richardson
AMNH_IZC 00319788	Male	Adult	PANAMA: Colon: Barro Colorado Island, Canal Zone 9 9 17.0 N, 79 50 53.0 W	1956-06-04	Carl W. Rettenmeyer,Marian E. Rettenmeyer
AMNH_IZC 00319789	Male	Adult	PANAMA: Colon: Barro Colorado Island, Canal Zone 9 9 17.0 N, 79 50 53.0 W	1956-06-15	Carl W. Rettenmeyer,Marian E. Rettenmeyer
AMNH_IZC 00319790	Male	Adult	PANAMA: Colon: Barro Colorado Island, Canal Zone 9 9 17.0 N, 79 50 53.0 W	1962-04-07	H. Ruckes
AMNH_IZC 00319791	Male	Adult	PANAMA: Colon: Barro Colorado Island, Canal Zone 9 9 17.0 N, 79 50 53.0 W	1962-04-08	H. Ruckes
AMNH_IZC 00319792	Male	Adult	PANAMA: Colon: Barro Colorado Island, Canal Zone 9 9 17.0 N, 79 50 53.0 W	1962-07-01	H. Ruckes
AMNH_IZC 00319793	Male	Adult	PANAMA: Colon: Barro Colorado Island, Canal Zone 9 9 17.0 N, 79 50 53.0 W	1962-04-25	H. Ruckes
AMNH_IZC 00319794	Male	Adult	PANAMA: Colon: Barro Colorado Island, Canal Zone 9 9 17.0 N, 79 50 53.0 W	1940-12-25	Kenneth W. Cooper
AMNH_IZC 00319795	Male	Adult	PANAMA: Colon: Barro Colorado Island, Canal Zone 9 9 17.0 N, 79 50 53.0 W	1940-12-25	Kenneth W. Cooper
AMNH_IZC 00319796	Male	Adult	PANAMA: Colon: Barro Colorado Island, Canal Zone 9 9 17.0 N, 79 50 53.0 W	1941-01-23	Kenneth W. Cooper
AMNH_IZC 00319797	Male	Adult	PANAMA: Colon: Barro Colorado Island, Canal Zone 9 9 17.0 N, 79 50 53.0 W	1941-01-19	Kenneth W. Cooper
AMNH_IZC 00319798	Female	Adult	PANAMA: Colon: Barro Colorado Island, Canal Zone 9 9 17.0 N, 79 50 53.0 W	1936-02-11	Gertsch,Lutz,Wood
AMNH_IZC 00319799	Male	Adult	PANAMA: Colon: Barro Colorado Island, Canal Zone 9 9 17.0 N, 79 50 53.0 W	1973-06-01	B. Bivins
AMNH_IZC 00319800	Male	Adult	PANAMA: Colon: Barro Colorado Island, Canal Zone 9 9 17.0 N, 79 50 53.0 W	1972-12-12	D. Engleman
AMNH_IZC 00319801	Female	Adult	PANAMA: Colon: Barro Colorado Island, Canal Zone 9 9 17.0 N, 79 50 53.0 W	1973-10-11	D. Engleman
AMNH_IZC 00319802	Female	Adult	PANAMA: Colon: Barro Colorado Island, Canal Zone 9 9 17.0 N, 79 50 53.0 W	1973-10-18	D. Engleman
AMNH_IZC 00319803	Male	Adult	PANAMA: Panama: None: Pipeline road, Canal Zone 9 7 11.1 N, 79 41 43.3 W; 200 ft	1977-05-27	D. Engleman
AMNH_IZC 00319805	Male	Adult	PANAMA: Chiriqui: Renacimiento: Santa Clara 8 50 0 N, 82 46 0 W	1977-07-15	R. Hartmann
AMNH_IZC 00319809	Male	Adult	PERU: Tumbes: none: Plateros	1957-06-01	R. Hidalgo
AMNH_IZC 00319810	Male	Adult	PERU: Tumbes: none: Cabeza de Lagarto		Unknown
AMNH_IZC 00319811	Female	Adult	PERU: Tumbes: none: Cabeza de Lagarto		Unknown
AMNH_IZC 00319814	Male	Adult	UNKNOWN: unknown: unknown: Unknown		Unknown
AMNH_IZC 00319815	Male	Adult	COLOMBIA: unknown: unknown: ""Colombia"" 0 N, 0 E		Unknown
AMNH_IZC 00319816	Male	Adult	UNKNOWN: unknown: unknown: Unknown	1970	Unknown
AMNH_IZC 00319817	Male	Adult	UNKNOWN: unknown: unknown: Unknown	1970	Unknown
AMNH_IZC 00319818	Female	Adult	UNKNOWN: unknown: unknown: Unknown	1970	Unknown
AMNH_IZC 00319819	Female	Adult	UNKNOWN: unknown: unknown: Unknown	1970	Unknown
AMNH_IZC 00319778	Female	Adult	BELIZE: Corozal: Benque Viejo 18 16 0.0 N, 88 27 W		Stanton
AMNH_IZC 00319777	Male	Adult	BELIZE: Cayo: Augustine, Rio Frio Cave C; 1500'	1972-07-30	S. Peck,J. Peck
AMNH_IZC 00319806	Male	Adult	BELIZE: unknown: Belize 0 N, 0 E		Unknown
AMNH_IZC 00319807	Female	Adult	BELIZE: unknown: Belize 0 N, 0 E		Unknown
AMNH_IZC 00319808	Female	Adult	BELIZE: unknown: Belize 0 N, 0 E		Unknown
AMNH_IZC 00319787	unknown	Adult	COSTA RICA: Unknown: Costa Rica 10 N, 84 W		Unknown
AMNH_IZC 00319820	Female	Adult	COSTA RICA: Cartago: Turrialba; 2080 ft	1963-07-14	Scullen,Bollinger
AMNH_IZC 00319779	Male	Adult	EL SALVADOR: San Salvador: San Salvador 13 42 31 N, 89 12 11 W; 2162 ft	1950-04-17	John Bourset
AMNH_IZC 00319774	Male	Adult	GUATEMALA: Santa Rosa: Sabanetas, La Roja		Unknown
AMNH_IZC 00319775		Nymph	GUATEMALA: Santa Rosa: Sabanetas, La Roja		Unknown
AMNH_IZC 00319776	Male	Adult	GUATEMALA: Quezaltenango: Cerro Zunil; 4000 ft.		G. C. Champion
AMNH_IZC 00319781	Male	Adult	HONDURAS: Cortes: San Pedro Sula 15 30 N, 88 2 0 W	1973-09-23	Jeff Baier
AMNH_IZC 00319804	Male	Adult	PANAMA: Chiriqui: Dstr. Renacimiento, Santa Clara 8 50 0 N, 82 46 0 W; 4000 ft	1977-05-21	Engleman
AMNH_IZC 00319785	Male	Adult	COSTA RICA: Cartago: Turrialba: Turrialba 9 54 N, 83 40 59 W	1966-09-12	Robin Andrews
AMNH_IZC 00319786	Female	Adult	COSTA RICA: Cartago: Turrialba: Turrialba 9 54 N, 83 40 59 W	1966-09-03	Robin Andrews
